# Supplementary material for: Emission characteristics of reactive organic gases (ROGs) from industrial volatile chemical products (VCPs) in the Pearl River Delta (PRD), China
Source: Copernicus journal article supplement (doi:10.5194/acp-24-7101-2024), 2024-06-20
Supplement: Supplementary file 1 [file acp-24-7101-2024-supplement.pdf]

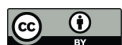

*Supplement of*

## **Emission characteristics of reactive organic gases (ROGs) from industrial volatile chemical products (VCPs) in the Pearl River Delta (PRD), China**

**Sihang Wang et al.**

*Correspondence to:* Bin Yuan (byuan@jnu.edu.cn)

The copyright of individual parts of the supplement might differ from the article licence.

16 **Section S1. Detail information of test industrial volatile chemical**  
17 **product (VCP) sources**

18 The shoemaking industry, as an important economic sector in developing  
19 countries, holds significance as one of the industrial VCP sources in the Pearl River  
20 Delta (PRD) region (Zheng et al., 2013;Estevan et al., 2012). Reactive organic gases  
21 (ROGs) emissions in this industry primarily originate from the extensive use of  
22 industrial adhesives, which compositions predominantly consist of butanone, acetone,  
23 cyclohexane, and ethyl acetate (Zheng et al., 2013;Zhao et al., 2018;Estevan et al.,  
24 2012). The factories involved in this study primarily specialize in producing leather  
25 shoes, high-heeled shoes, and other footwear products, with the bottom forming process  
26 serving as the primary source of ROG emissions.

27 In the production of various daily necessities including electronic products and  
28 auto parts, the process of plastic surface coating plays a crucial role. Raw materials of  
29 plastic are nylon, polypropylene, and polycarbonate, and the industrial water-borne  
30 coatings was mainly used to spray in this industry. As a representative industry in this  
31 study, a plastic toy factory specializing in the production of plastic toys and electronic  
32 toys was selected. The main processes contributing to ROG emissions in this factory  
33 were manual and automatic spraying (workshop A (manual-spray workshop) and  
34 workshop B (auto-spray workshop) in Fig 1b). The concentration of oxygenated ROG  
35 species (OVOCs) showed marginal increase after treatment (Fig. S7), only C<sub>8</sub> aromatics  
36 exhibited a slight decrease. This could be due to the fact that the adsorption materials  
37 used in the ROG treatment devices may not be effective for all ROGs, necessitating  
38 timely replacement and underscoring the importance of ROGs removal by treatment  
39 devices.

40 The furniture coating industry is recognized as a significant sector for the  
41 prevention and control of ROGs in China due to its outdated technology, low pollution  
42 control levels, and high ROG emissions (Zheng et al., 2013). Due to the extensive use  
43 of industrial coatings (including water-borne and solvent-borne coatings) in the  
44 furniture coating industry, ROG emissions mainly come from the primer and topcoat

45 processes (Zhou et al., 2020;Zheng et al., 2013;Fang et al., 2019). As the representative  
46 industry in this study, a wood furniture coating factory was selected where topcoat  
47 spraying emerged as the primary source of ROG emissions. The discrepancy between  
48 ROG concentrations before and after treatment indicates that the ROGs treatment  
49 device was ineffective in this factory, possibly due to device malfunction or insufficient  
50 replacement of adsorption materials in a timely manner.

51 The printing industry employs various printing techniques, including offset,  
52 gravure, letterpress, and digital, to produce a wide range of printed products, such as  
53 books, brochures, packaging, and labels (Zheng et al., 2013). ROG emissions from this  
54 industry were mainly derived from the industrial inks utilized in the printing production  
55 (Zhou et al., 2020;Zheng et al., 2013;Fang et al., 2019). In this study, a comprehensive  
56 printing factory encompassing packaging and digital printing was selected as the  
57 representative industry, with ROG emissions are generated through the use of industrial  
58 inks during the manufacturing process.

59 As one of the important ports and shipbuilding bases in China, the PRD region  
60 has a solid foundation in the shipbuilding industry. Utilization of solvent-borne  
61 industrial coatings for ship coating remains prevalent due to stringent requirements for  
62 anti-rust and anti-corrosion properties. The cost-effectiveness and superior efficiency  
63 of solvent-borne industrial coatings outweigh the preference for water-borne industrial  
64 coatings alternative (Malherbe and Mandin, 2007). For this study, a large ship coating  
65 factory was selected as a representative industry, with ROG emissions primarily  
66 occurring during the coating spraying process. Since the coating spraying process is  
67 limited to a single workshop, we conducted three repeated experiments at the same  
68 sampling point (workshops and after treatment device) to validate our test results (Fig.  
69 S6b). It was observed that the concentrations of typical ROGs during the second and  
70 third sampling were consistent and stable, indicating the stability of waste gas collection  
71 and power generation by the ROGs treatment device. Conversely, the fluctuating  
72 concentrations observed during the initial sampling could be attributed to the fresh start  
73 of the coating spraying process in the factory or the preheating state of the ROGs

74 treatment device.

## 75 **Section S2. The fractions of ROGs in total ROG emissions**

76 Combined with the measurements of canisters measured by gas chromatography-  
77 mass spectrometer/flame ionization detector (canister-GC-MS/FID) and proton transfer  
78 reaction time-of-flight mass spectrometer based on  $\text{H}_3\text{O}^+$  and  $\text{NO}^+$  chemical ionization  
79 ( $\text{H}_3\text{O}^+/\text{NO}^+$  PTR-ToF-MS), more comprehensive speciation of ROG emissions from  
80 industrial VCP sources had been characteristic, and the fractions of ROGs in total ROG  
81 emissions can be determined for various industrial VCP sources.

82 In this study, a more comprehensive speciation of ROGs was achieved by the  
83 combination of GC-MS/FID and PTR-ToF-MS, the same ROG species from the  
84 combination measurement should be counted only once. All ROG species detected in  
85 this study is summarized in Table S2. Specifically, to facilitate comparison with  
86 traditional photochemical assessment monitoring stations (PAMS) species,  $\text{C}_6$ - $\text{C}_{10}$   
87 aromatics were identified using GC/MS-FID, while  $\text{C}_{10}$ - $\text{C}_{12}$  alkanes were detected  
88 using  $\text{NO}^+$  PTR-ToF-MS, as GC-MS/FID only containing the n-alkanes. For unknown  
89 ROG species, we used the semi-quantity based on the methods.

90 As shown in Fig. S5, we compared concentrations of toluene and  $\text{C}_8$  aromatics  
91 from the offline canister-GC-MS/FID and the online  $\text{H}_3\text{O}^+/\text{NO}^+$  PTR-ToF-MS,  
92 obtaining generally consistent results, considering the large variation in ROG emissions  
93 for manufacturing processes conditions and the difficulty to control the fill time for  
94 canisters. Due to the results of toluene and  $\text{C}_8$  aromatics from  $\text{H}_3\text{O}^+$  PTR-ToF-MS and  
95 the offline canister-GC-MS/FID were consistent in our previous emission source  
96 campaign (Wang et al., 2022), the ROGs/toluene ratio and ROGs/ $\text{C}_8$  aromatics ratio  
97 were used to evaluate the fractions of ROGs in total ROG emissions. Specifically,  
98 ROGs/toluene ratio was used in shoemaking and printing industries, and ROGs/ $\text{C}_8$   
99 aromatics ratio was used in plastic surface coating, furniture coating, and ship coating  
100 industries, considering the real-time concentrations of toluene and  $\text{C}_8$  aromatics in  
101 various industries, and the consistency between offline canister GC-MS/FID and

102 H<sub>3</sub>O<sup>+</sup>/NO<sup>+</sup> PTR-ToF-MS (Fig. S5). The fractions were calculated as Equation (1) and  
103 (2):

104

$$105 \quad Fraction_{ROGs,i} = \frac{\frac{C_{ROGs,i}}{C_{toluene,PTR}}}{\left(\frac{C_{ROGs,i}}{C_{toluene,PTR}} + \frac{C_{other\ ROGs,i}}{C_{toluene,GC}}\right)} * 100\% \quad (1)$$

106

$$107 \quad Fraction_{ROGs,i} = \frac{\frac{C_{ROGs,i}}{C_{C8\ Aromatics,PTR}}}{\left(\frac{C_{ROGs,i}}{C_{C8\ Aromatics,PTR}} + \frac{C_{other\ ROGs,i}}{C_{C8\ Aromatics,GC}}\right)} * 100\% \quad (2)$$

108

109 Where  $Fraction_{ROGs,i}$  is the fraction of ROGs, i;  $C_{ROGs,i}$ ,  $C_{toluene,PTR}$ , and  
110  $C_{C8\ Aromatics,PTR}$  are the concentrations of ROGs, i, toluene, and C<sub>8</sub> aromatics measured  
111 by H<sub>3</sub>O<sup>+</sup> PTR-ToF-MS.  $C_{other\ ROGs,i}$ ,  $C_{toluene,GC}$ , and  $C_{C8\ Aromatics,GC}$  are the  
112 concentrations of other ROGs, i, toluene, and C<sub>8</sub> aromatics measured by offline  
113 canister-GC-MS/FID, and the concentration of C<sub>8</sub> aromatics was the total concentration  
114 of ethylbenzene, o-xylene, and m/p-xylene.

115

116 **Supplement tables**

117 **Table S1.** Detailed information of the test industrial VCP sources in this study.

118

| <b>Industrial VCP sources</b> | <b>Sampling location</b> | <b>samples</b> |
|-------------------------------|--------------------------|----------------|
| Shoemaking                    | Semi-open workshops      | 3              |
|                               | Before treatment         | 1              |
|                               | After treatment (stack)  | 1              |
| Plastic surface coating       | Semi-open workshops      | 5              |
|                               | Before treatment         | 3              |
|                               | After treatment (stack)  | 2              |
| Furniture coating             | Semi-open workshops      | 5              |
|                               | Before treatment         | 1              |
|                               | After treatment (stack)  | 1              |
| Printing                      | Semi-open workshops      | 4              |
|                               | Before treatment         | 3              |
|                               | After treatment (stack)  | 2              |
| Ship coating                  | Semi-open workshops      | 3              |
|                               | Before treatment         | -              |
|                               | After treatment (stack)  | 3              |

119

120

121 **Table S2. Detailed information of ROG species measured by different instruments.**

122

| Components                       | Measurements                      | ROG species                                                                                           |
|----------------------------------|-----------------------------------|-------------------------------------------------------------------------------------------------------|
| OVOCs                            | PTR-H <sub>3</sub> O <sup>+</sup> | formula only including CHO                                                                            |
| N/S-containing                   | PTR-H <sub>3</sub> O <sup>+</sup> | formula including CHN, CHS, CHON, CHOS, and CHONS                                                     |
| Heavy aromatics and monoterpenes | PTR-H <sub>3</sub> O <sup>+</sup> | monoterpenes, C <sub>11</sub> -C <sub>20</sub> aromatics and polynuclear aromatic hydrocarbons (PAHs) |
| Higher alkanes                   | PTR-NO <sup>+</sup>               | C <sub>10</sub> -C <sub>20</sub> acyclic, cyclic and bicyclic alkanes                                 |
| Alkanes                          | GC-MS/FID                         | C <sub>2</sub> -C <sub>9</sub> alkanes                                                                |
| Alkenes                          | GC-MS/FID                         | C <sub>2</sub> -C <sub>6</sub> alkenes                                                                |
| Aromatics                        | GC-MS/FID                         | C <sub>6</sub> -C <sub>10</sub> aromatics                                                             |
| Halohydrocarbons                 | GC-MS/FID                         | C <sub>1</sub> -C <sub>6</sub> halohydrocarbons                                                       |

123

124

125 **Table S3.** Sensitivities of H<sub>3</sub>O<sup>+</sup> PTR-ToF-MS for various ROGs calibrated with  
 126 standard gas.  
 127

| ROGs                                 | Ion formula (H <sup>+</sup> )                                                 | Sensitivity,<br>cps·ppb <sup>-1</sup> |
|--------------------------------------|-------------------------------------------------------------------------------|---------------------------------------|
| Species calibrated with standard gas |                                                                               |                                       |
| HCN                                  | HCNH <sup>+</sup>                                                             | 630.86                                |
| Formaldehyde                         | CH <sub>2</sub> OH <sup>+</sup>                                               | 1063.76                               |
| Methanol                             | CH <sub>4</sub> OH <sup>+</sup>                                               | 757.38                                |
| Acetonitrile                         | C <sub>2</sub> H <sub>3</sub> NH <sup>+</sup>                                 | 3006.75                               |
| Acetaldehyde                         | C <sub>2</sub> H <sub>4</sub> OH <sup>+</sup>                                 | 3782.23                               |
| Ethanol                              | C <sub>2</sub> H <sub>6</sub> OH <sup>+</sup>                                 | 131.58                                |
| Acrolein                             | C <sub>3</sub> H <sub>4</sub> OH <sup>+</sup>                                 | 4097.50                               |
| Acetone                              | C <sub>3</sub> H <sub>6</sub> OH <sup>+</sup>                                 | 4943.88                               |
| Isopropanol                          | C <sub>3</sub> H <sub>8</sub> OH <sup>+</sup>                                 | -                                     |
| Furan                                | C <sub>4</sub> H <sub>4</sub> OH <sup>+</sup>                                 | 2993.73                               |
| Isoprene                             | C <sub>5</sub> H <sub>8</sub> H <sup>+</sup>                                  | 1589.89                               |
| MVK                                  | C <sub>4</sub> H <sub>6</sub> OH <sup>+</sup>                                 | 3396.10                               |
| MEK                                  | C <sub>4</sub> H <sub>8</sub> OH <sup>+</sup>                                 | 4089.86                               |
| Hydroxy acetone                      | C <sub>3</sub> H <sub>6</sub> O <sub>2</sub> H <sup>+</sup>                   | 3172.43                               |
| Benzene                              | C <sub>6</sub> H <sub>6</sub> H <sup>+</sup>                                  | 3629.18                               |
| 2-Pentanone                          | C <sub>5</sub> H <sub>10</sub> OH <sup>+</sup>                                | 4120.96                               |
| Ethyl acetate                        | C <sub>4</sub> H <sub>8</sub> O <sub>2</sub> H <sup>+</sup>                   | 959.96                                |
| Toluene                              | C <sub>7</sub> H <sub>8</sub> H <sup>+</sup>                                  | 4584.74                               |
| Phenol                               | C <sub>6</sub> H <sub>6</sub> OH <sup>+</sup>                                 | 5064.30                               |
| Furfural                             | C <sub>5</sub> H <sub>4</sub> O <sub>2</sub> H <sup>+</sup>                   | 10109.39                              |
| Methyl Isobutyl Ketone               | C <sub>6</sub> H <sub>12</sub> OH <sup>+</sup>                                | 3446.37                               |
| Styrene                              | C <sub>8</sub> H <sub>8</sub> H <sup>+</sup>                                  | 5858.41                               |
| o-Xylene                             | C <sub>8</sub> H <sub>10</sub> H <sup>+</sup>                                 | 4883.79                               |
| m-Cresol                             | C <sub>7</sub> H <sub>8</sub> OH <sup>+</sup>                                 | 5191.14                               |
| 1,2,4-Teimethylbenzene               | C <sub>9</sub> H <sub>12</sub> H <sup>+</sup>                                 | 5337.79                               |
| Guaiacol                             | C <sub>7</sub> H <sub>8</sub> O <sub>2</sub> H <sup>+</sup>                   | 7090.09                               |
| Naphthalene                          | C <sub>10</sub> H <sub>8</sub> H <sup>+</sup>                                 | 7485.81                               |
| a-Pinene                             | C <sub>10</sub> H <sub>16</sub> H <sup>+</sup>                                | 1626.14                               |
| Chlorobenzene                        | C <sub>6</sub> H <sub>5</sub> ClH <sup>+</sup>                                | 5084.49                               |
| 1,3-Dichlorobenzene                  | C <sub>6</sub> H <sub>4</sub> Cl <sub>2</sub> H <sup>+</sup>                  | 6314.09                               |
| 1,3,5-Trichlorobenzene               | C <sub>6</sub> H <sub>3</sub> Cl <sub>3</sub> H <sup>+</sup>                  | 8130.16                               |
| D3 Siloxane                          | C <sub>6</sub> H <sub>18</sub> O <sub>3</sub> Si <sub>3</sub> H <sup>+</sup>  | 3620.62                               |
| D4 Siloxane                          | C <sub>8</sub> H <sub>24</sub> O <sub>4</sub> Si <sub>4</sub> H <sup>+</sup>  | 3236.92                               |
| D5 Siloxane                          | C <sub>10</sub> H <sub>30</sub> O <sub>5</sub> Si <sub>5</sub> H <sup>+</sup> | 2991.05                               |

128



129 **Table S4.** Sensitivities of NO<sup>+</sup> PTR-ToF-MS for alkanes and cycloalkanes calibrated  
 130 with standard gas.

131

| ROGs                                 | Formula                         | Sensitivity,<br>ncps·ppb <sup>-1</sup> |
|--------------------------------------|---------------------------------|----------------------------------------|
| Species calibrated with standard gas |                                 |                                        |
| C <sub>8</sub> Alkanes               | C <sub>8</sub> H <sub>18</sub>  | 99.79                                  |
| C <sub>9</sub> Alkanes               | C <sub>9</sub> H <sub>20</sub>  | 79.91                                  |
| C <sub>10</sub> Alkanes              | C <sub>10</sub> H <sub>22</sub> | 68.27                                  |
| C <sub>11</sub> Alkanes              | C <sub>11</sub> H <sub>24</sub> | 68.13                                  |
| C <sub>12</sub> Alkanes              | C <sub>12</sub> H <sub>26</sub> | 77.43                                  |
| C <sub>13</sub> Alkanes              | C <sub>13</sub> H <sub>28</sub> | 104.81                                 |
| C <sub>14</sub> Alkanes              | C <sub>14</sub> H <sub>30</sub> | 140.81                                 |
| C <sub>15</sub> Alkanes              | C <sub>15</sub> H <sub>32</sub> | 164.34                                 |
| C <sub>10</sub> cyclic alkanes       | C <sub>10</sub> H <sub>20</sub> | 137.54                                 |
| C <sub>11</sub> cyclic alkanes       | C <sub>11</sub> H <sub>22</sub> | 119.71                                 |
| C <sub>12</sub> cyclic alkanes       | C <sub>12</sub> H <sub>24</sub> | 131.94                                 |
| C <sub>13</sub> cyclic alkanes       | C <sub>13</sub> H <sub>26</sub> | 147.60                                 |
| C <sub>14</sub> cyclic alkanes       | C <sub>14</sub> H <sub>28</sub> | 150.12                                 |
| C <sub>15</sub> cyclic alkanes       | C <sub>15</sub> H <sub>30</sub> | 137.38 <sup>a</sup>                    |

132 <sup>a</sup>: The average sensitivity of C<sub>10</sub>–C<sub>14</sub> cyclic alkanes was used to predict the concentrations of cyclic  
 133 alkanes with higher carbon (C<sub>15</sub>–C<sub>20</sub>) and bicyclic alkanes (C<sub>10</sub>–C<sub>20</sub>) (Chen et al., 2022).

134

135

136 **Table S5.** Sensitivities of H<sub>3</sub>O<sup>+</sup> PTR-ToF-MS for various ROGs calibrated with liquid  
137 calibration unit (LCU).

138

| <b>ROGs</b>                                           | <b>Ion formula</b>                                           | <b>Sensitivity,<br/>cps·ppb<sup>-1</sup></b> |
|-------------------------------------------------------|--------------------------------------------------------------|----------------------------------------------|
| Species calibrated with liquid calibration unit (LCU) |                                                              |                                              |
| Formic acid                                           | CH <sub>2</sub> O <sub>2</sub> H <sup>+</sup>                | 939.43                                       |
| Acetic acid                                           | C <sub>2</sub> H <sub>4</sub> O <sub>2</sub> H <sup>+</sup>  | 1876.45                                      |
| Propionic acid                                        | C <sub>3</sub> H <sub>6</sub> O <sub>2</sub> H <sup>+</sup>  | 2272.36                                      |
| Butyric acid                                          | C <sub>4</sub> H <sub>8</sub> O <sub>2</sub> H <sup>+</sup>  | 3531.01                                      |
| Pyrrole                                               | C <sub>4</sub> H <sub>5</sub> NH <sup>+</sup>                | 3219.67                                      |
| Formamide                                             | CH <sub>3</sub> NOH <sup>+</sup>                             | 3567.04                                      |
| Acetamide                                             | C <sub>2</sub> H <sub>5</sub> NOH <sup>+</sup>               | 4959.81                                      |
| Catechol                                              | C <sub>6</sub> H <sub>6</sub> O <sub>2</sub> H <sup>+</sup>  | 2035.52                                      |
| Guaiacol                                              | C <sub>7</sub> H <sub>8</sub> O <sub>2</sub> H <sup>+</sup>  | 5989.24                                      |
| 2-Nitrophenol                                         | C <sub>6</sub> H <sub>5</sub> NO <sub>3</sub> H <sup>+</sup> | 4469.34                                      |
| 2-Nitro-p-Cresol                                      | C <sub>7</sub> H <sub>7</sub> NO <sub>3</sub> H <sup>+</sup> | 2335.15                                      |

139

140

141 **Table S6.** The formula and purity of the chemicals used in characteristic product ion  
 142 recognition experiment are shown. Product ions of the reactions of H<sub>3</sub>O<sup>+</sup> and NO<sup>+</sup> ions  
 143 with their percentages of each indicated in brackets.  
 144

| Chemicals         | Formula                                       | Purity (%) | Mode                          | Product ions (%)                                                              |                                                                              |                                                                                         |
|-------------------|-----------------------------------------------|------------|-------------------------------|-------------------------------------------------------------------------------|------------------------------------------------------------------------------|-----------------------------------------------------------------------------------------|
| Methyl acetate    | C <sub>3</sub> H <sub>6</sub> O <sub>2</sub>  | 99.9%      | H <sub>3</sub> O <sup>+</sup> | <b>C<sub>3</sub>H<sub>6</sub>O<sub>2</sub>H<sup>+</sup></b><br><b>(94.8)</b>  | C <sub>2</sub> H <sub>4</sub> O <sub>2</sub> H <sup>+</sup><br>(0.5)         | C <sub>2</sub> H <sub>2</sub> OH <sup>+</sup><br>(4.7)                                  |
| Ethyl acetate     | C <sub>4</sub> H <sub>8</sub> O <sub>2</sub>  | 99.9%      | H <sub>3</sub> O <sup>+</sup> | <b>C<sub>4</sub>H<sub>8</sub>O<sub>2</sub>H<sup>+</sup></b><br><b>(72.4)</b>  | C <sub>2</sub> H <sub>4</sub> O <sub>2</sub> H <sup>+</sup><br>(22.2)        | C <sub>2</sub> H <sub>2</sub> OH <sup>+</sup><br>(5.4)                                  |
| Isopropyl acetate | C <sub>5</sub> H <sub>10</sub> O <sub>2</sub> | 99.9%      | H <sub>3</sub> O <sup>+</sup> | C <sub>5</sub> H <sub>10</sub> O <sub>2</sub> H <sup>+</sup><br>(12.7)        | <b>C<sub>2</sub>H<sub>4</sub>O<sub>2</sub>H<sup>+</sup></b><br><b>(73.5)</b> | C <sub>2</sub> H <sub>2</sub> OH <sup>+</sup><br>(13.8)                                 |
| Vinyl acetate     | C <sub>4</sub> H <sub>6</sub> O <sub>2</sub>  | 99.9%      | H <sub>3</sub> O <sup>+</sup> | <b>C<sub>4</sub>H<sub>6</sub>O<sub>2</sub>H<sup>+</sup></b><br><b>(19.5)</b>  | C <sub>2</sub> H <sub>4</sub> O <sub>2</sub> H <sup>+</sup><br>(2.1)         | C <sub>2</sub> H <sub>2</sub> OH <sup>+</sup><br>(78.4)                                 |
| Methyl acetate    | C <sub>3</sub> H <sub>6</sub> O <sub>2</sub>  | 99.9%      | NO <sup>+</sup>               | <b>C<sub>3</sub>H<sub>6</sub>O<sub>2</sub>NO<sup>+</sup></b><br><b>(82.6)</b> | C <sub>3</sub> H <sub>6</sub> O <sub>2</sub> H <sup>+</sup><br>(14.0)        | C <sub>3</sub> H <sub>6</sub> O <sub>2</sub> (H <sub>2</sub> O)H <sup>+</sup><br>(3.4)  |
| Ethyl acetate     | C <sub>4</sub> H <sub>8</sub> O <sub>2</sub>  | 99.9%      | NO <sup>+</sup>               | <b>C<sub>4</sub>H<sub>8</sub>O<sub>2</sub>NO<sup>+</sup></b><br><b>(80.0)</b> | C <sub>4</sub> H <sub>8</sub> O <sub>2</sub> H <sup>+</sup><br>(17.4)        | C <sub>4</sub> H <sub>8</sub> O <sub>2</sub> (H <sub>2</sub> O)H <sup>+</sup><br>(2.6)  |
| Vinyl acetate     | C <sub>4</sub> H <sub>6</sub> O <sub>2</sub>  | 99.9%      | NO <sup>+</sup>               | C <sub>4</sub> H <sub>6</sub> O <sub>2</sub> NO <sup>+</sup><br>(0.3)         | C <sub>4</sub> H <sub>6</sub> O <sub>2</sub> H <sup>+</sup><br>(6.5)         | C <sub>4</sub> H <sub>6</sub> O <sub>2</sub> (H <sub>2</sub> O)H <sup>+</sup><br>(1.5)  |
|                   |                                               |            |                               | <b>C<sub>2</sub>H<sub>2</sub>OH<sup>+</sup></b><br><b>(46.9)</b>              | C <sub>2</sub> H <sub>4</sub> O <sub>2</sub> H <sup>+</sup><br>(20.4)        | C <sub>2</sub> H <sub>4</sub> O <sub>2</sub> (H <sub>2</sub> O)H <sup>+</sup><br>(24.4) |
| Acetone           | C <sub>3</sub> H <sub>6</sub> O               | 99.7%      | NO <sup>+</sup>               | <b>C<sub>3</sub>H<sub>6</sub>ONO<sup>+</sup></b><br><b>(77.2)</b>             | C <sub>3</sub> H <sub>6</sub> OH <sup>+</sup><br>(22.8)                      |                                                                                         |
| isoPropanol       | C <sub>3</sub> H <sub>8</sub> O               | 99.5%      | NO <sup>+</sup>               | <b>C<sub>3</sub>H<sub>7</sub>O<sup>+</sup></b><br><b>(88.1%)</b>              | C <sub>3</sub> H <sub>8</sub> OH <sup>+</sup><br>(4.1)                       | C <sub>3</sub> H <sub>7</sub> O(H <sub>2</sub> O) <sup>+</sup><br>(3.7)                 |
|                   |                                               |            |                               | C <sub>3</sub> H <sub>6</sub> H <sup>+</sup><br>(2.5)                         | C <sub>3</sub> H <sub>8</sub> O(H <sub>2</sub> O)H <sup>+</sup><br>(1.6)     |                                                                                         |

145

146

147 **Table S7.** The  $\theta$  angles ( $^{\circ}$ ) among the mass spectra of industrial VCP sources in this  
 148 study and vehicular emissions from previous study (Wang et al., 2022).  
 149

| ROG sources             | Shoe making | plastic surface coating | Furniture coating | Printing | Ship coating | Gasoline vehicle | Diesel vehicle | LPG vehicle |
|-------------------------|-------------|-------------------------|-------------------|----------|--------------|------------------|----------------|-------------|
| Shoemaking              | 0           | 61.8                    | 67.6              | 74.3     | 85.6         | 83.0             | 78.6           | 78.2        |
| plastic surface coating |             | 0                       | 75.1              | 27.4     | 88.9         | 88.7             | 81.1           | 81.9        |
| Furniture coating       |             |                         | 0                 | 82.6     | 63.4         | 73.3             | 70.0           | 71.6        |
| Printing                |             |                         |                   | 0        | 89.7         | 89.5             | 86.9           | 86.7        |
| Ship coating            |             |                         |                   |          | 0            | 51.1             | 80.7           | 72.2        |
| Gasoline                |             |                         |                   |          |              | 0                | 74.8           | 67.8        |
| Diesel                  |             |                         |                   |          |              |                  | 0              | 41.2        |
| LPG                     |             |                         |                   |          |              |                  |                | 0           |

150

151

152 **Table S8.** The  $\theta$  angles ( $^{\circ}$ ) among the mass spectra of different workshops in industrial  
 153 VCP sources.  
 154

| (a) Shoemaking industry workshops angles ( $^{\circ}$ ) |      |       |       |
|---------------------------------------------------------|------|-------|-------|
| No.                                                     | 1    | 2     | 3     |
| 1                                                       | 0.00 | 24.88 | 60.26 |
| 2                                                       |      | 0.00  | 52.35 |
| 3                                                       |      |       | 0.00  |

  

| (b) Plastic surface coating industry workshops angles ( $^{\circ}$ ) |      |       |       |       |       |
|----------------------------------------------------------------------|------|-------|-------|-------|-------|
| No.                                                                  | 1    | 2     | 3     | 4     | 5     |
| 1                                                                    | 0.00 | 20.65 | 13.60 | 40.60 | 46.03 |
| 2                                                                    |      | 0.00  | 18.18 | 36.69 | 31.94 |
| 3                                                                    |      |       | 0.00  | 40.73 | 45.86 |
| 4                                                                    |      |       |       | 0.00  | 44.20 |
| 5                                                                    |      |       |       |       | 0.00  |

  

| (c) Furniture coating industry workshops angles ( $^{\circ}$ ) |      |       |       |       |       |
|----------------------------------------------------------------|------|-------|-------|-------|-------|
| No.                                                            | 1    | 2     | 3     | 4     | 5     |
| 1                                                              | 0.00 | 21.60 | 29.45 | 36.38 | 26.01 |
| 2                                                              |      | 0.00  | 19.77 | 22.57 | 13.43 |
| 3                                                              |      |       | 0.00  | 14.13 | 14.53 |
| 4                                                              |      |       |       | 0.00  | 19.04 |
| 5                                                              |      |       |       |       | 0.00  |

  

| (d) Printing industry workshops angles ( $^{\circ}$ ) |      |      |      |      |
|-------------------------------------------------------|------|------|------|------|
| No.                                                   | 1    | 2    | 3    | 4    |
| 1                                                     | 0.00 | 2.47 | 6.52 | 5.88 |
| 2                                                     |      | 0.00 | 7.57 | 6.99 |
| 3                                                     |      |      | 0.00 | 2.09 |
| 4                                                     |      |      |      | 0.00 |

  

| (e) Ship coating industry workshops angles ( $^{\circ}$ ) |      |      |      |
|-----------------------------------------------------------|------|------|------|
| No.                                                       | 1    | 2    | 3    |
| 1                                                         | 0.00 | 9.04 | 7.96 |
| 2                                                         |      | 0.00 | 1.58 |
| 3                                                         |      |      | 0.00 |

155  
 156

157 **Table S9.** The  $\theta$  angles ( $^{\circ}$ ) among the mass spectra of different emission standards from  
 158 vehicular emissions.  
 159

| (a) Gasoline vehicle angles ( $^{\circ}$ ) |         |          |           |          |         |          |
|--------------------------------------------|---------|----------|-----------|----------|---------|----------|
| Emission standard                          | China I | China II | China III | China IV | China V | China VI |
| China I                                    | 0.00    | 6.12     | 6.58      | 10.36    | 9.63    | 16.83    |
| China II                                   |         | 0.00     | 4.85      | 8.39     | 7.18    | 13.21    |
| China III                                  |         |          | 0.00      | 9.48     | 5.68    | 13.71    |
| China IV                                   |         |          |           | 0.00     | 6.21    | 13.32    |
| China V                                    |         |          |           |          | 0.00    | 11.79    |
| China VI                                   |         |          |           |          |         | 0.00     |

  

| (b) Light-duty diesel truck angles ( $^{\circ}$ ) |           |          |         |
|---------------------------------------------------|-----------|----------|---------|
| Emission standard                                 | China III | China IV | China V |
| China III                                         | 0.00      | 17.71    | 49.38   |
| China IV                                          |           | 0.00     | 45.28   |
| China V                                           |           |          | 0.00    |

  

| (c) Middle-duty diesel truck angles ( $^{\circ}$ ) |           |          |         |
|----------------------------------------------------|-----------|----------|---------|
| Emission standard                                  | China III | China IV | China V |
| China III                                          | 0.00      | 38.56    | 63.77   |
| China IV                                           |           | 0.00     | 31.08   |
| China V                                            |           |          | 0.00    |

  

| (d) Heavy-duty diesel truck angles ( $^{\circ}$ ) |           |          |         |
|---------------------------------------------------|-----------|----------|---------|
| Emission standard                                 | China III | China IV | China V |
| China III                                         | 0.00      | 71.21    | 65.05   |
| China IV                                          |           | 0.00     | 18.41   |
| China V                                           |           |          | 0.00    |

160

161

**Table S10.** Weight percentage (%) of ROG components to total ROG emissions at workshops and stack (after-treatment) from shoemaking, plastic surface coating, furniture coating, printing, and ship coating industries.

| Weight percentage (%)                         |                                   | Shoemaking |       | Plastic surface coating |          | Furniture coating |       | Printing  |          | Ship coating |          |
|-----------------------------------------------|-----------------------------------|------------|-------|-------------------------|----------|-------------------|-------|-----------|----------|--------------|----------|
| Components                                    | Measurement                       | Workshops  | Stack | Workshops               | Stack    | Workshops         | Stack | Workshops | Stack    | Workshops    | Stack    |
| OVOCs                                         | PTR-H <sub>3</sub> O <sup>+</sup> | 47.6±12.5  | 67.1  | 63.3±21.2               | 96.1±0.2 | 66.9±5.1          | 76.8  | 61.0±1.5  | 84.6±6.5 | 10.6±2.8     | 16.4±3.5 |
| N/S-containing                                | PTR-H <sub>3</sub> O <sup>+</sup> | 0.1±0.1    | 0.1   | 0.1±0.0                 | 0.3±0.1  | 0.1±0.0           | 0.0   | 0.0±0.0   | 0.1±0.0  | 0.1±0.0      | 0.1±0.0  |
| Si/Cl-containing <sup>a</sup>                 | PTR-H <sub>3</sub> O <sup>+</sup> | 0.1±0.1    | 0.0   | 0.0±0.0                 | 0.0±0.0  | 0.0±0.0           | 0.0   | 0.0±0.0   | 0.0±0.0  | 0.0±0.0      | 0.0±0.0  |
| Heavy aromatics and monoterpenes <sup>b</sup> | PTR-H <sub>3</sub> O <sup>+</sup> | 0.2±0.0    | 0.0   | 0.1±0.1                 | 0.3±0.0  | 0.3±0.1           | 0.3   | 0.1±0.1   | 0.0±0.0  | 1.2±0.3      | 1.3±0.1  |
| Higher alkanes <sup>c</sup>                   | PTR-NO <sup>+</sup>               | 2.0±0.3    | 0.0   | 0.8±0.6                 | 0.1±0.1  | 0.3±0.4           | 0.1   | 27.0±2.7  | 8.2±2.4  | 1.9±1.1      | 6.5±2.1  |
| Alkanes                                       | GC-MS/FID                         | 24.7±1.4   | 26.1  | 23.4±18.6               | 2.2±0.5  | 3.4±0.6           | 0.5   | 5.3±4.1   | 1.4±1.3  | 1.3±0.4      | 0.6±0.2  |
| Alkenes                                       | GC-MS/FID                         | 0.6±0.4    | 0.1   | 0.3±0.1                 | 0.1±0.1  | 0.1±0.0           | 0.0   | 0.1±0.0   | 0.9±1.2  | 0.1±0.0      | 0.0±0.0  |
| Aromatics                                     | GC-MS/FID                         | 17.4±6.0   | 6.1   | 7.2±1.6                 | 0.4±0.4  | 26.3±5.6          | 22.1  | 4.5±4.5   | 0.7±0.2  | 83.5±2.3     | 73.7±6.1 |
| Halohydrocarbons                              | GC-MS/FID                         | 7.3±4.8    | 0.5   | 4.8±1.6                 | 0.5±0.3  | 2.6±0.3           | 0.2   | 1.9±1.5   | 4.2±4.0  | 1.4±0.1      | 1.5±0.6  |

<sup>a</sup>: Si/Cl-containing including D<sub>3</sub>-D<sub>6</sub> siloxanes and chlorobenzenes.

<sup>b</sup>: Heavy aromatics and monoterpenes including monoterpenes, C<sub>11</sub>-C<sub>20</sub> aromatics and PAHs such as naphthalene, methylnaphthalene etc.

<sup>c</sup>: Higher alkanes including C<sub>10</sub>-C<sub>20</sub> acyclic, cyclic and bicyclic alkanes.

**Table S11.** Fractions of ROG components to total OH reactivity (OHR) of ROGs at workshops and stack (after-treatment) in shoemaking, plastic surface coating, furniture coating, printing, and ship coating industries.

| Fraction (%)                                  |                                   | Shoemaking |       | Plastic surface coating |          | Furniture coating |       | Printing  |          | Ship coating |          |
|-----------------------------------------------|-----------------------------------|------------|-------|-------------------------|----------|-------------------|-------|-----------|----------|--------------|----------|
| Components                                    | Measurement                       | Workshops  | Stack | Workshops               | Stack    | Workshops         | Stack | Workshops | Stack    | Workshops    | Stack    |
| OVOCs                                         | PTR-H <sub>3</sub> O <sup>+</sup> | 44.4±16.7  | 72.1  | 62.3±19.8               | 97.3±0.6 | 78.0±3.8          | 87.7  | 58.0±6.9  | 84.5±6.9 | 8.1±2.6      | 15.1±3.6 |
| N/S-containing                                | PTR-H <sub>3</sub> O <sup>+</sup> | 0.2±0.1    | 0.1   | 0.0±0.0                 | 0.0±0.0  | 0.0±0.0           | 0.0   | 0.0±0.1   | 0.1±0.1  | 0.0±0.0      | 0.0±0.0  |
| Si/Cl-containing <sup>a</sup>                 | PTR-H <sub>3</sub> O <sup>+</sup> | 0.0±0.0    | 0.0   | 0.0±0.0                 | 0.0±0.0  | 0.0±0.0           | 0.0   | 0.0±0.0   | 0.0±0.0  | 0.0±0.0      | 0.0±0.0  |
| Heavy aromatics and monoterpenes <sup>b</sup> | PTR-H <sub>3</sub> O <sup>+</sup> | 1.5±0.3    | 0.1   | 0.4±0.4                 | 0.1±0.0  | 0.9±0.1           | 0.1   | 0.6±0.4   | 0.2±0.1  | 3.2±0.6      | 3.8±0.4  |
| Higher alkanes <sup>c</sup>                   | PTR-NO <sup>+</sup>               | 1.7±0.5    | 0.0   | 0.7±0.5                 | 0.1±0.1  | 0.1±0.1           | 0.1   | 30.1±2.4  | 9.0±2.0  | 0.8±0.5      | 1.8±0.9  |
| Alkanes                                       | GC-MS/FID                         | 18.3±0.5   | 20.2  | 19.3±17.7               | 1.3±0.4  | 1.2±0.1           | 0.1   | 3.3±2.4   | 0.9±0.9  | 0.6±0.2      | 0.3±0.1  |
| Alkenes                                       | GC-MS/FID                         | 3.6±2.7    | 0.6   | 2.3±0.9                 | 0.3±0.3  | 0.5±0.0           | 0.0   | 0.6±0.2   | 4.4±6.1  | 0.3±0.1      | 0.1±0.0  |
| Aromatics                                     | GC-MS/FID                         | 30.4±14.6  | 6.9   | 15.1±2.1                | 0.8±0.7  | 19.4±3.9          | 12.1  | 7.4±7.5   | 0.9±0.2  | 87.0±2.8     | 79.0±4.8 |

<sup>a</sup>: Si/Cl-containing are including D<sub>3</sub>-D<sub>6</sub> siloxanes and chlorobenzenes.

<sup>b</sup>: Heavy aromatics and monoterpenes are including monoterpenes, C<sub>11</sub>-C<sub>20</sub> aromatics and PAHs such as naphthalene, methylnaphthalene etc.

<sup>c</sup>: Higher alkanes are including C<sub>10</sub>-C<sub>20</sub> acyclic, cyclic and bicyclic alkanes.



**Table S12.** Fractions of the top ten most abundant species in total ROG emissions, total OHR, and total ozone formation potential (OFP) from (a) shoemaking, (b) plastic surface coating, (c) furniture coating, (d) printing, and (e) ship coating industries.

| (a) Shoemaking |                    |         |              |               |         |              |                |         |              |
|----------------|--------------------|---------|--------------|---------------|---------|--------------|----------------|---------|--------------|
| num            | Concentration      |         |              | OH reactivity |         |              | OFP            |         |              |
|                | species name       | formula | fraction (%) | species name  | formula | fraction (%) | species name   | formula | fraction (%) |
| 1              | Isopentane         | C5H12   | 24.39        | isoPropanol   | C3H8O   | 27.32        | Isopentane     | C5H12   | 24.53        |
| 2              | MEK                | C4H8O   | 21.36        | MEK           | C4H8O   | 24.73        | MEK            | C4H8O   | 21.94        |
| 3              | isoPropanol        | C3H8O   | 20.54        | Isopentane    | C5H12   | 18.53        | Toluene        | C7H8    | 15.22        |
| 4              | Acetone            | C3H6O   | 12.64        | Formaldehyde  | CH2O    | 9.93         | Formaldehyde   | CH2O    | 13.98        |
| 5              | Ethyl acetate      | C4H8O2  | 6.19         | Toluene       | C7H8    | 5.10         | isoPropanol    | C3H8O   | 8.69         |
| 6              | Toluene            | C7H8    | 5.48         | Ethyl acetate | C4H8O2  | 1.91         | Acetone        | C3H6O   | 3.16         |
| 7              | Formaldehyde       | CH2O    | 2.13         | Butanediol    | C4H10O2 | 1.35         | Ethyl acetate  | C4H8O2  | 2.70         |
| 8              | Dimethyl carbonate | C3H6O3  | 0.80         | MTBE          | C5H12O  | 1.02         | Glyoxal        | C2H2O2  | 1.03         |
| 9              | Methyl acetate     | C3H6O2  | 0.62         | Acetaldehyde  | C2H4O   | 0.73         | Acetaldehyde   | C2H4O   | 0.65         |
| 10             | Ethanol            | C2H6O   | 0.55         | Acetone       | C3H6O   | 0.66         | Methyl glyoxal | C3H4O2  | 0.61         |
|                | Total fraction     |         | 94.71        |               |         | 91.29        |                |         | 92.52        |

  

| (b) Plastic surface coating |                |         |              |                |         |              |               |         |              |
|-----------------------------|----------------|---------|--------------|----------------|---------|--------------|---------------|---------|--------------|
| num                         | Concentration  |         |              | OH reactivity  |         |              | OFP           |         |              |
|                             | species name   | formula | fraction (%) | species name   | formula | fraction (%) | species name  | formula | fraction (%) |
| 1                           | isoPropanol    | C3H8O   | 45.89        | isoPropanol    | C3H8O   | 54.16        | isoPropanol   | C3H8O   | 25.41        |
| 2                           | Acetone        | C3H6O   | 16.41        | Formaldehyde   | CH2O    | 12.64        | Formaldehyde  | CH2O    | 25.08        |
| 3                           | Cyclohexanone  | C6H10O  | 14.08        | Cyclohexanone  | C6H10O  | 10.24        | Cyclohexanone | C6H10O  | 17.02        |
| 4                           | Butyl acetate  | C6H12O2 | 3.52         | Acetaldehyde   | C2H4O   | 4.99         | Acetaldehyde  | C2H4O   | 6.61         |
| 5                           | Formaldehyde   | CH2O    | 3.00         | Butyl acetate  | C6H12O2 | 2.12         | Acetone       | C3H6O   | 5.29         |
| 6                           | Methyl acetate | C3H6O2  | 2.85         | Dimethyl furan | C6H8O   | 1.08         | Butyl acetate | C6H12O2 | 2.62         |

|    |                |        |       |               |        |       |            |        |       |
|----|----------------|--------|-------|---------------|--------|-------|------------|--------|-------|
| 7  | Methanol       | CH4O   | 2.10  | Furan         | C4H4O  | 1.07  | Glyoxal    | C2H2O2 | 2.17  |
| 8  | Isopentane     | C5H12  | 1.59  | Allyl acetate | C5H6O2 | 0.98  | Isopentane | C5H12  | 2.06  |
| 9  | Ethyl acetate  | C4H8O2 | 1.44  | Isopentane    | C5H12  | 0.93  | MVK+MACR   | C4H6O  | 1.52  |
| 10 | Acetaldehyde   | C2H4O  | 1.13  | Methyl furan  | C5H6O  | 0.87  | Methanol   | CH4O   | 1.26  |
|    | Total fraction |        | 92.01 |               |        | 89.09 |            |        | 89.04 |

(c) Furniture coating

| num | Concentration  |         |              | OH reactivity          |         |              | OFP           |         |              |
|-----|----------------|---------|--------------|------------------------|---------|--------------|---------------|---------|--------------|
|     | species name   | formula | fraction (%) | species name           | formula | fraction (%) | species name  | formula | fraction (%) |
| 1   | MEK            | C4H8O   | 13.01        | Acetylacetone          | C5H8O2  | 30.28        | m/p-Xylene    | C8H10   | 31.06        |
| 2   | m/p-Xylene     | C8H10   | 10.88        | 2-ethyl-1,3-hexanediol | C8H18O2 | 26.34        | o-Xylene      | C8H10   | 13.41        |
| 3   | Acetylacetone  | C5H8O2  | 8.68         | m/p-Xylene             | C8H10   | 7.10         | MEK           | C4H8O   | 7.04         |
| 4   | Butyl acetate  | C6H12O2 | 6.19         | Tetralone              | C10H10O | 4.37         | Butyl lactate | C7H14O3 | 5.05         |
| 5   | Butyl lactate  | C7H14O3 | 6.06         | MEK                    | C4H8O   | 4.18         | Hexanone      | C6H12O  | 4.77         |
| 6   | Ethyl acetate  | C4H8O2  | 5.80         | Butyl Lactate          | C7H14O3 | 4.03         | Ethyl benzene | C8H10   | 4.36         |
| 7   | PGMEA          | C6H12O3 | 4.85         | Hexanone               | C6H12O  | 3.26         | Formaldehyde  | CH2O    | 4.03         |
| 8   | o-Xylene       | C8H10   | 4.80         | o-Xylene               | C8H10   | 2.25         | Vinyl Acetate | C4H6O2  | 3.93         |
| 9   | Hexanone       | C6H12O  | 4.15         | Vinyl Acetate          | C4H6O2  | 2.11         | Acetylacetone | C5H8O2  | 3.21         |
| 10  | Tetralone      | C10H10O | 4.07         | PGMEA                  | C6H12O3 | 1.53         | 1,2,4-TMB     | C9H12   | 2.65         |
|     | Total fraction |         | 68.47        |                        |         | 85.46        |               |         | 79.50        |

(d) Printing

| num | Concentration      |         |              | OH reactivity    |         |              | OFP           |         |              |
|-----|--------------------|---------|--------------|------------------|---------|--------------|---------------|---------|--------------|
|     | species name       | formula | fraction (%) | species name     | formula | fraction (%) | species name  | formula | fraction (%) |
| 1   | isoPropanol        | C3H8O   | 73.43        | isoPropanol      | C3H8O   | 74.66        | isoPropanol   | C3H8O   | 56.77        |
| 2   | Ethyl acetate      | C4H8O2  | 5.38         | C14 cycloalkanes | C14H28  | 4.23         | 1-Pentene     | C5H10   | 7.33         |
| 3   | Methylene chloride | CH2Cl2  | 4.06         | 1-Pentene        | C5H10   | 4.05         | Formaldehyde  | CH2O    | 5.06         |
| 4   | C14 cycloalkanes   | C14H28  | 3.46         | Acetaldehyde     | C2H4O   | 2.30         | Acetaldehyde  | C2H4O   | 4.91         |
| 5   | Ethanol            | C2H6O   | 2.16         | C13 cycloalkanes | C13H26  | 2.19         | Ethyl acetate | C4H8O2  | 4.30         |

|    |                  |        |       |                  |        |       |                  |        |       |
|----|------------------|--------|-------|------------------|--------|-------|------------------|--------|-------|
| 6  | C13 cycloalkanes | C13H26 | 1.78  | Ethanol          | C2H6O  | 1.71  | Ethanol          | C2H6O  | 4.19  |
| 7  | C15 cycloalkanes | C15H32 | 1.06  | Formaldehyde     | CH2O   | 1.49  | C14 cycloalkanes | C14H28 | 2.85  |
| 8  | Acetone          | C3H6O  | 0.95  | Ethyl acetate    | C4H8O2 | 1.29  | Toluene          | C7H8   | 1.88  |
| 9  | 1-Pentene        | C5H10  | 0.80  | C15 cycloalkanes | C15H32 | 1.06  | C13 cycloalkanes | C13H26 | 1.58  |
| 10 | n-Pentane        | C5H12  | 0.78  | MTBE             | C5H12O | 0.81  | n-Pentane        | C5H12  | 1.29  |
|    | Total fraction   |        | 93.86 |                  |        | 93.79 |                  |        | 90.16 |

(e) Ship coating

| num | Concentration      |         |              | OH reactivity |         |              | OFP            |         |              |
|-----|--------------------|---------|--------------|---------------|---------|--------------|----------------|---------|--------------|
|     | species name       | formula | fraction (%) | species name  | formula | fraction (%) | species name   | formula | fraction (%) |
| 1   | m/p-Xylene         | C8H10   | 38.78        | m/p-Xylene    | C8H10   | 51.32        | m/p-Xylene     | C8H10   | 55.46        |
| 2   | Ethyl benzene      | C8H10   | 21.12        | o-Xylene      | C8H10   | 14.25        | o-Xylene       | C8H10   | 20.96        |
| 3   | o-Xylene           | C8H10   | 14.96        | Ethyl benzene | C8H10   | 10.35        | Ethyl benzene  | C8H10   | 11.77        |
| 4   | MEK                | C4H8O   | 9.55         | MEK           | C4H8O   | 5.94         | MEK            | C4H8O   | 2.59         |
| 5   | Methanol           | CH4O    | 3.20         | Acetaldehyde  | C2H4O   | 3.28         | Acetaldehyde   | C2H4O   | 1.43         |
| 6   | 1,2-Dichloroethane | C2H4Cl2 | 1.32         | C11 Aromatics | C11H16  | 2.87         | Formaldehyde   | CH2O    | 1.17         |
| 7   | Acetaldehyde       | C2H4O   | 1.19         | Formaldehyde  | CH2O    | 1.69         | 1,2,4-TMB      | C9H12   | 1.03         |
| 8   | C11 Aromatics      | C11H16  | 1.04         | 1,2,4-TMB     | C9H12   | 1.27         | C11 Aromatics  | C11H16  | 1.03         |
| 9   | Ethanol            | C2H6O   | 0.88         | Acrolein      | C3H4O   | 1.05         | Acrolein       | C3H4O   | 0.49         |
| 10  | Formaldehyde       | CH2O    | 0.68         | Methanol      | CH4O    | 0.64         | m-Ethyltoluene | C9H12   | 0.45         |
|     | Total fraction     |         | 92.70        |               |         | 92.66        |                |         | 96.38        |

**Table S13.** The  $\theta$  angles ( $^{\circ}$ ) among the mass spectra of workshops, before and after treatment in industrial VCP sources.

| Industrial VCP sources  | Sites            | Workshops | Before treatment | After treatment |
|-------------------------|------------------|-----------|------------------|-----------------|
| Shoemaking              | Workshops        | 0.0       | 40.9             | 49.2            |
|                         | Before treatment | 40.9      | 0.0              | 27.0            |
|                         | After treatment  | 49.2      | 27.0             | 0.0             |
| Plastic surface coating | Workshops        | 0.0       | 26.0             | 15.6            |
|                         | Before treatment | 26.0      | 0.0              | 13.6            |
|                         | After treatment  | 15.6      | 13.6             | 0.0             |
| Furniture coating       | Workshops        | 0.0       | 8.3              | 12.5            |
|                         | Before treatment | 8.3       | 0.0              | 7.5             |
|                         | After treatment  | 12.5      | 7.5              | 0.0             |
| Printing                | Workshops        | 0.0       | 4.2              | 6.2             |
|                         | Before treatment | 4.2       | 0.0              | 2.5             |
|                         | After treatment  | 6.2       | 2.5              | 0.0             |
| Ship coating            | Workshops        | 0.0       |                  | 7.6             |
|                         | After treatment  | 7.6       |                  | 0.0             |

## Supplement figures

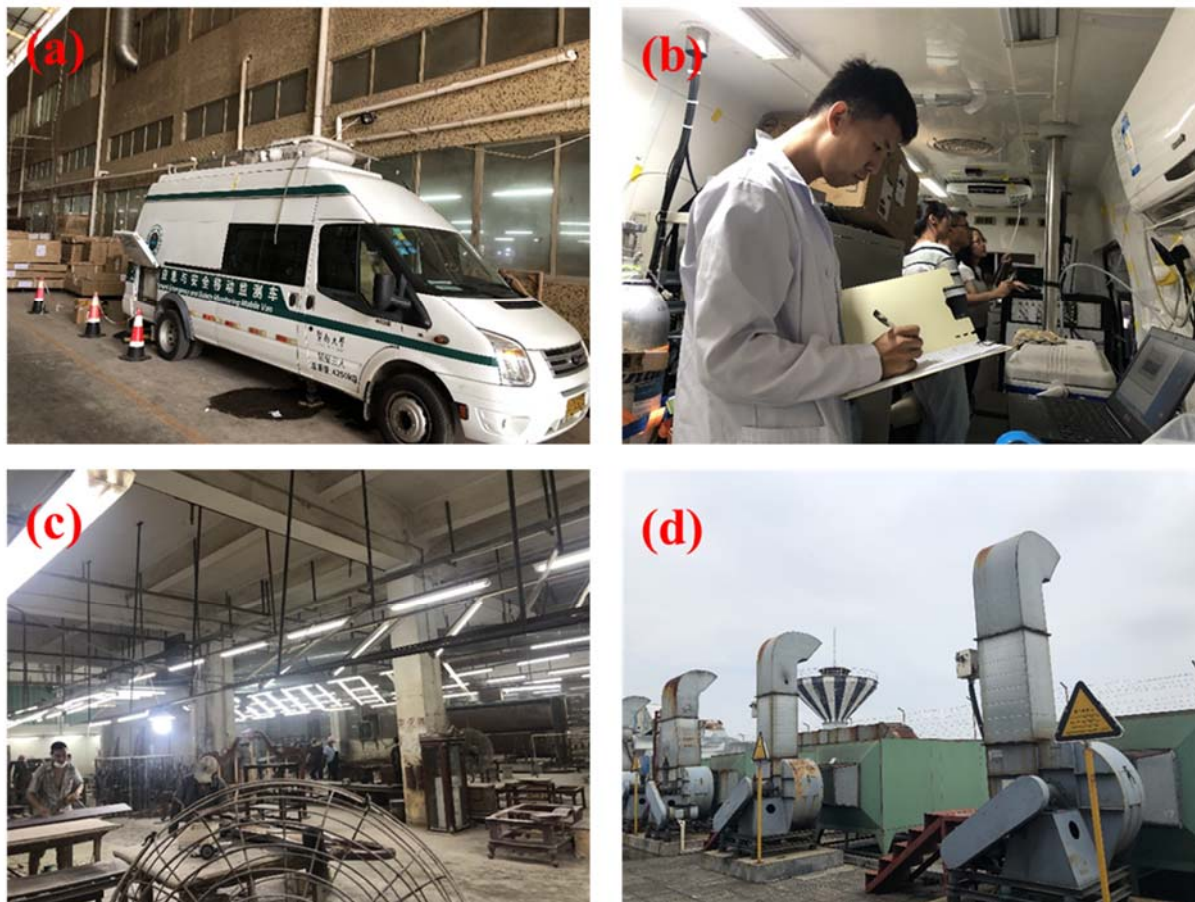

**Figure S1.** A (a) mobile monitoring vehicle was parking equipped with (b) online measurement instruments at a fixed site which close to (c) the sampling ports of semi-open workshops and (d) stack emissions.

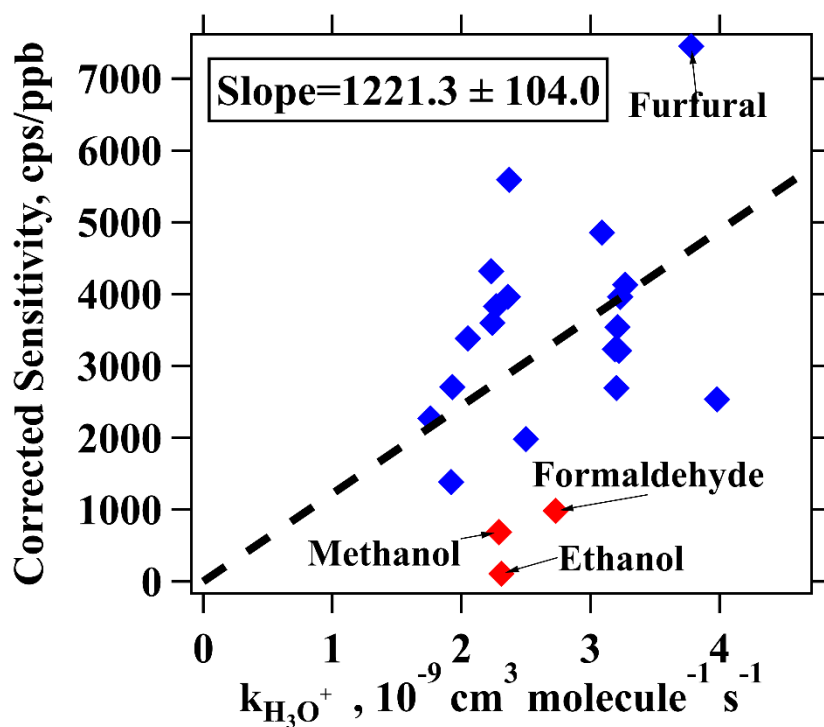

**Figure S2.** Corrected sensitivities as a function of kinetic rate constants for proton transfer reactions of  $\text{H}_3\text{O}^+$  with ROGs. The dashed line indicates the fitted line for blue points. The red points not used as these compounds (formaldehyde, methanol, and ethanol) are known to have lower sensitivities.

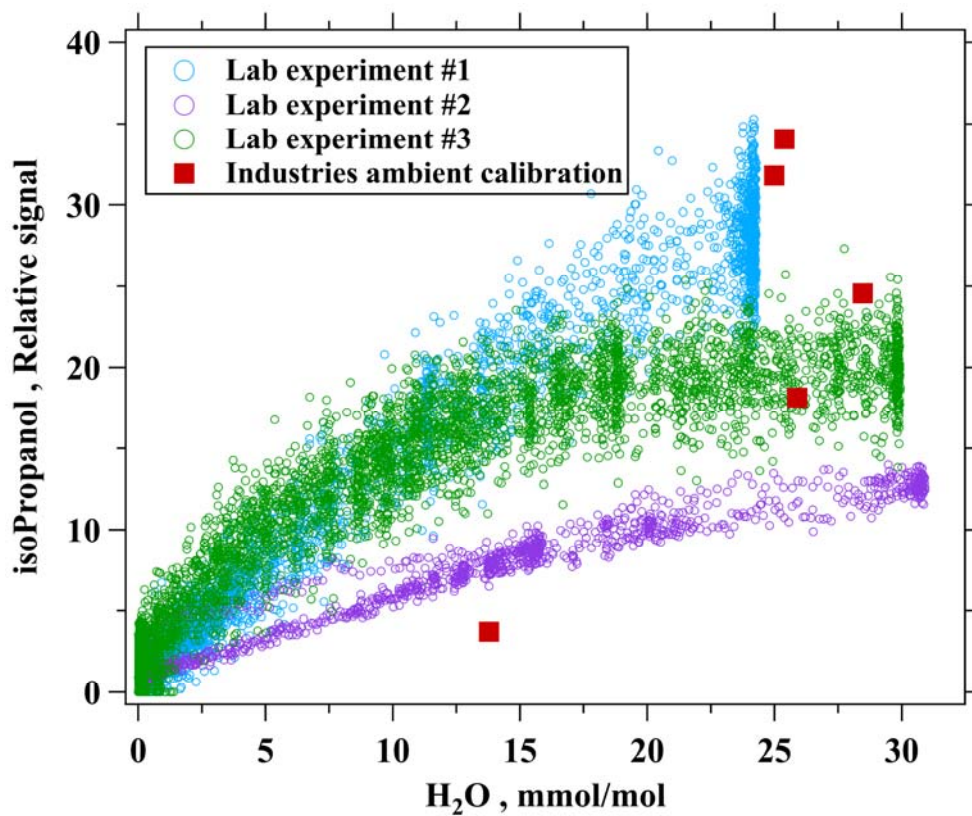

**Figure S3.** Humidity dependence of relative signal (wet versus dry) of isopropanol, including results in lab experiments (blue, green, and purple markers) and calibration the under ambient humidity conditions during the field campaign in this study (red markers).

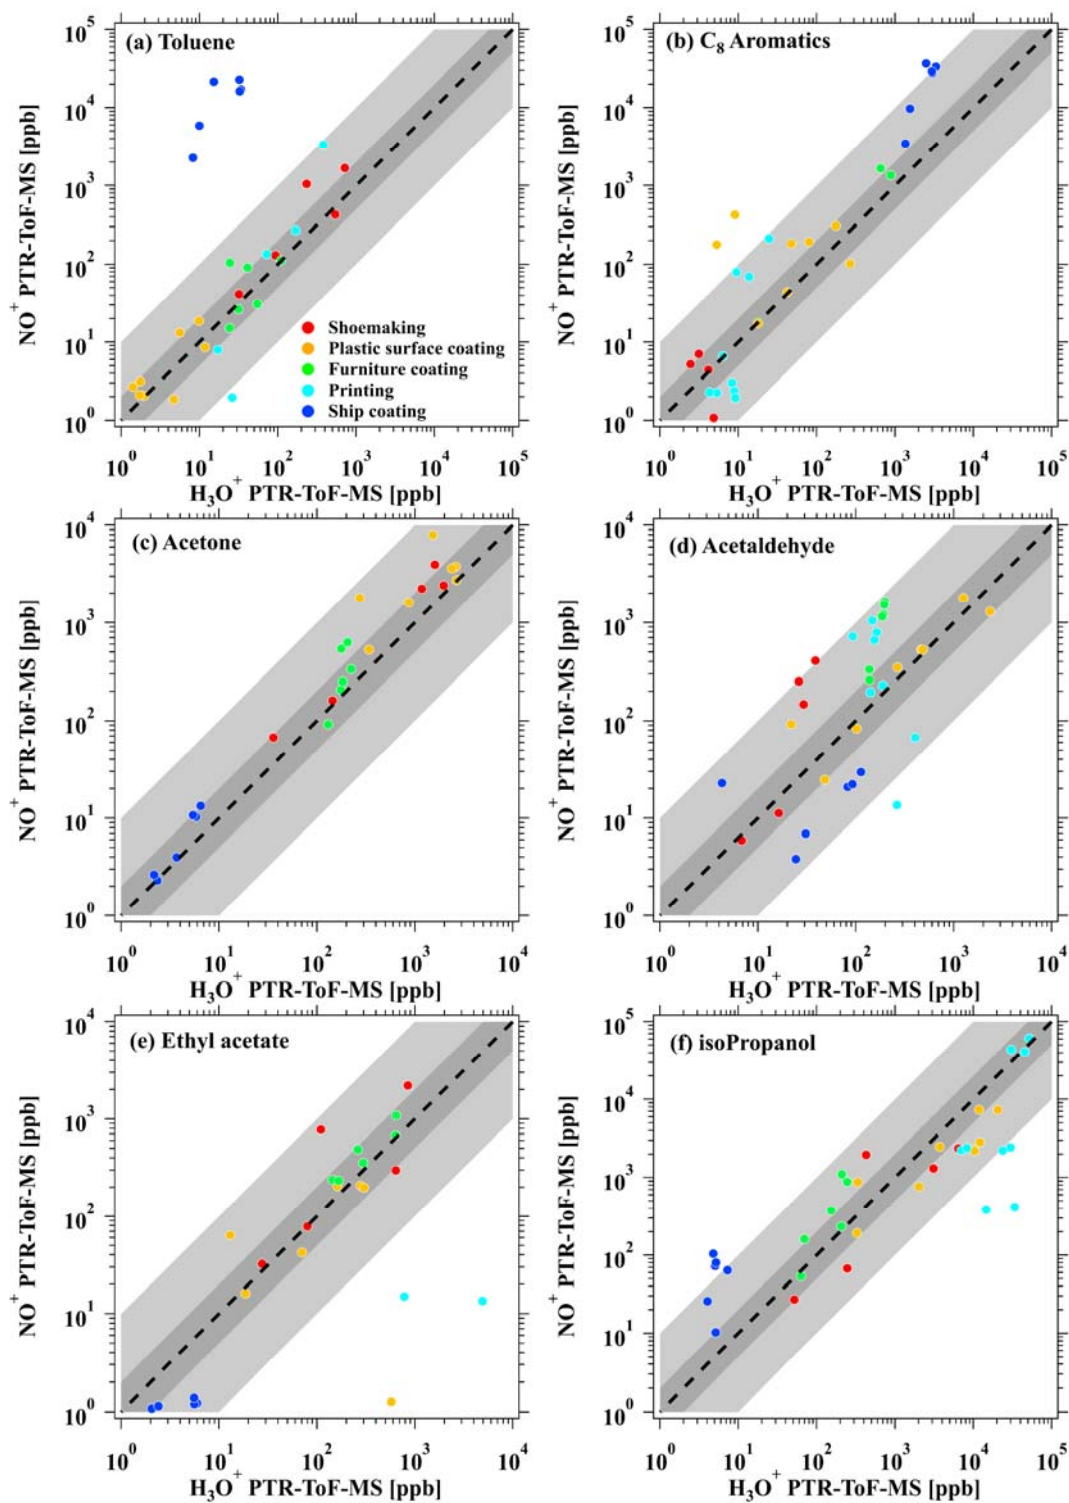

**Figure S4.** Scatterplot of (a) toluene, (b)  $\text{C}_8$  aromatics, (c) acetone, (d) acetaldehyde, (e) ethyl acetate, and (f) isopropanol concentrations measured by  $\text{H}_3\text{O}^+$  PTR-ToF-MS and  $\text{NO}^+$  PTR-ToF-MS. The black dashed lines represent 1:1 ratio, and the shaded areas represent ratios of a factor of 2 and 10.



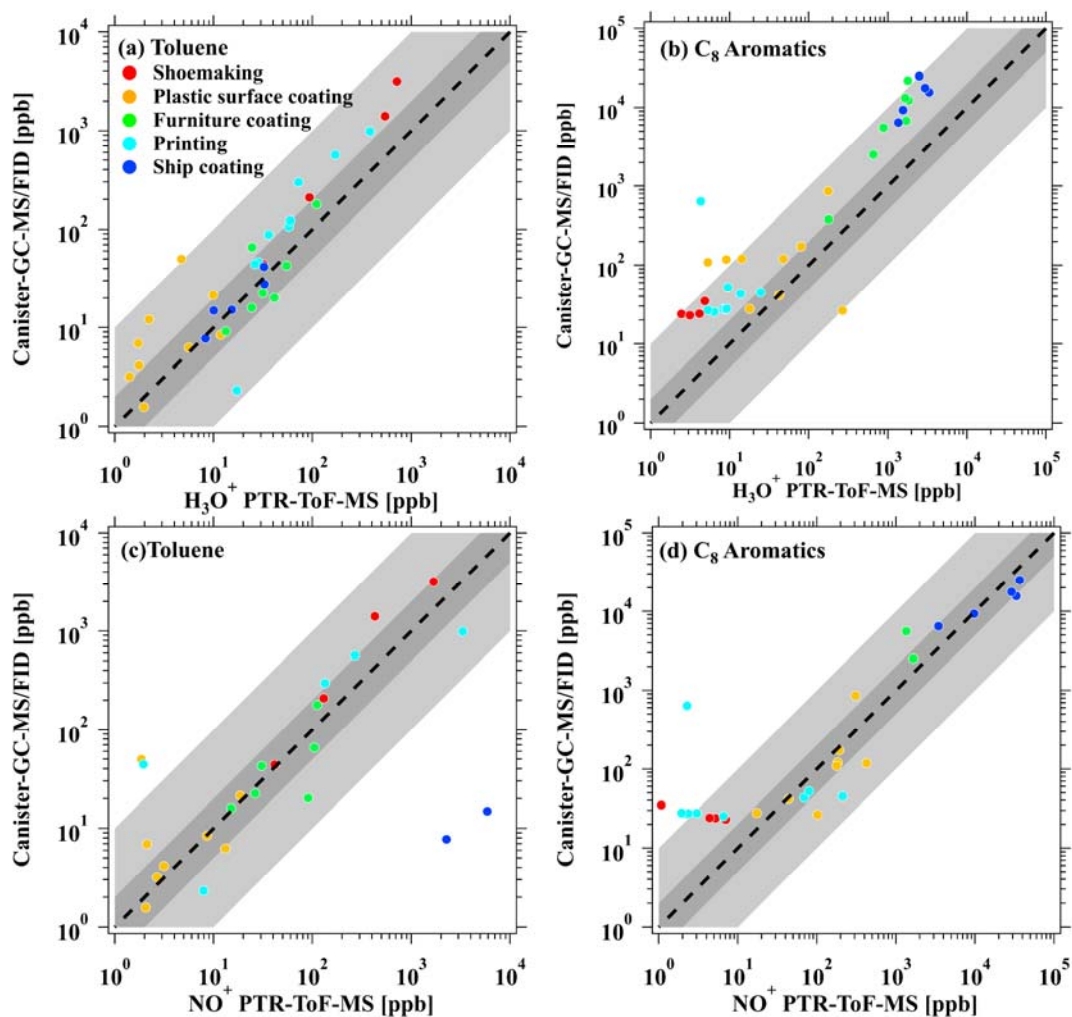

**Figure S5.** Scatterplot of (a) toluene and (b) C<sub>8</sub> aromatic concentrations measured by  $H_3O^+$  PTR-ToF-MS and canister-GC-MS/FID. And (c) toluene and (d) C<sub>8</sub> aromatics concentrations measured by  $NO^+$  PTR-ToF-MS and canister-GC-MS/FID. The black dashed lines represent 1:1 ratio, and the shaded areas represent ratios of a factor of 2 and 10.

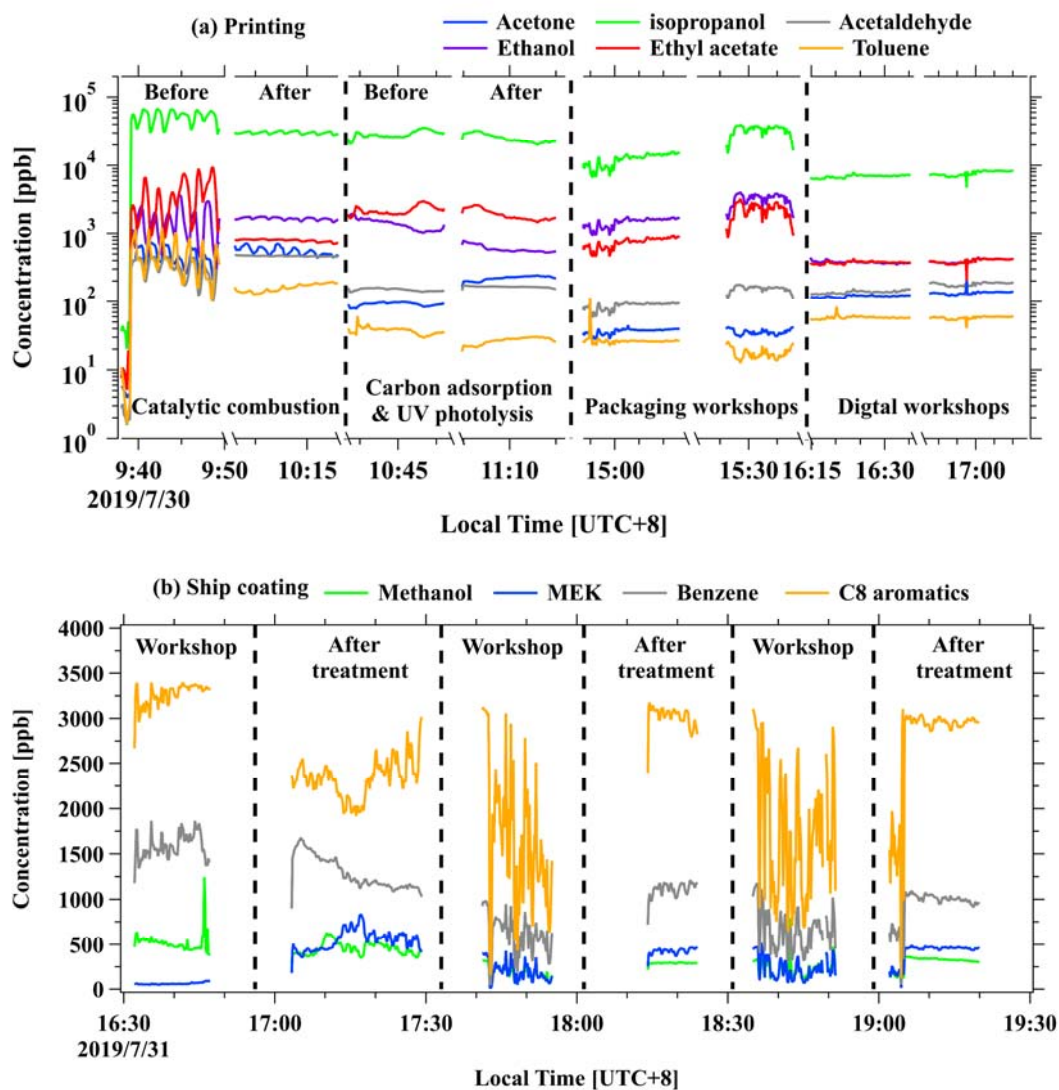

**Figure S6.** Real-time concentrations of representative ROGs from workshops, before and after the ROG treatment devices in (a) printing and (b) ship coating industries.

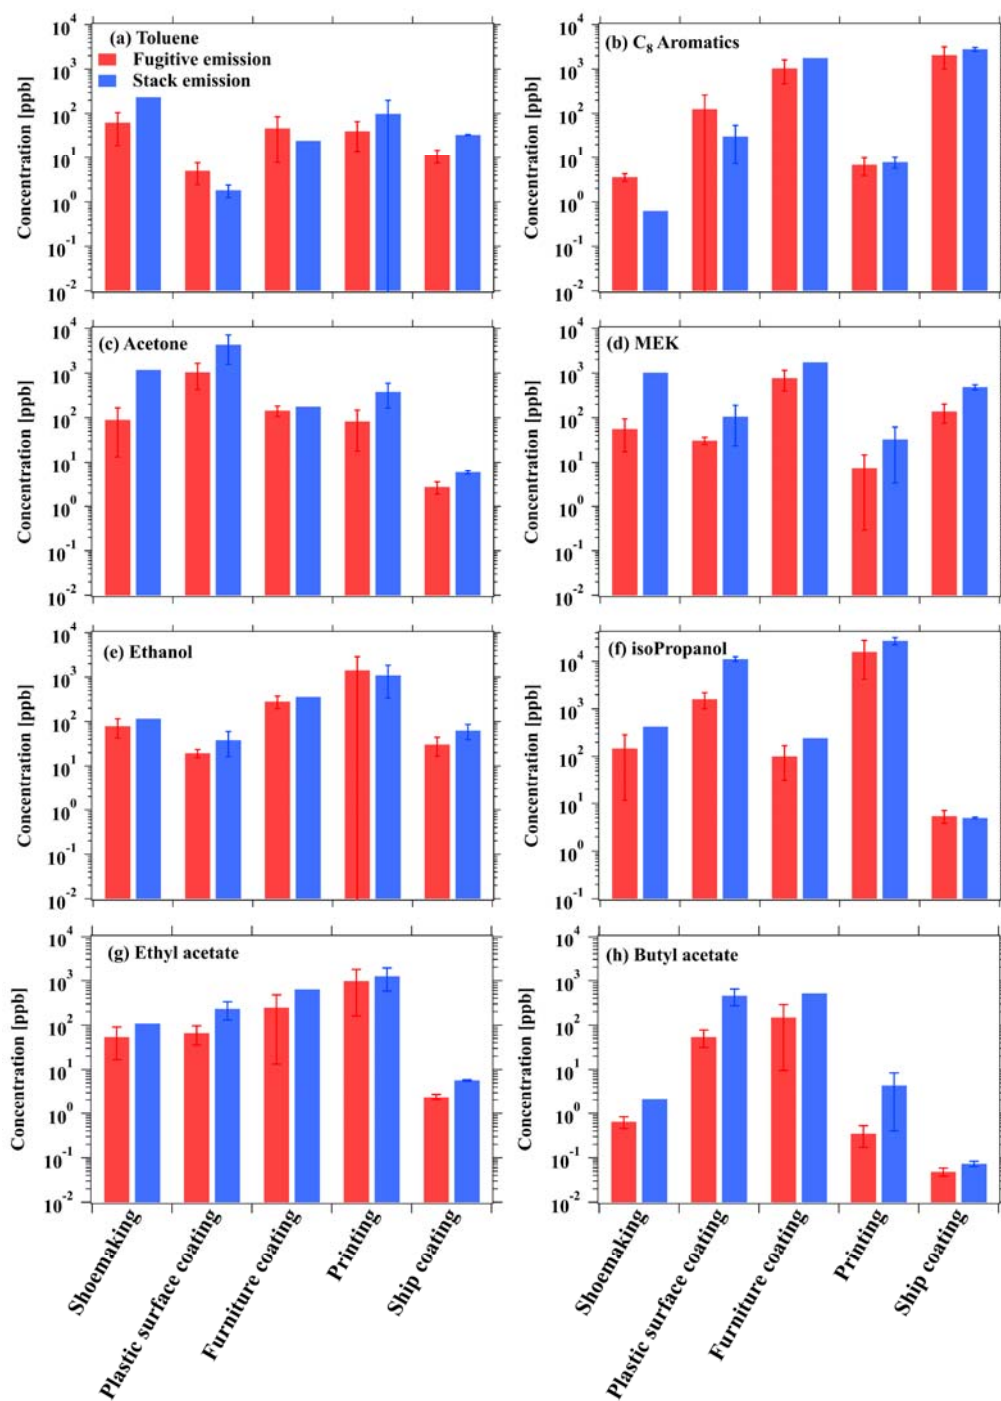

**Figure S7.** Average concentrations of (a) toluene, (b) C<sub>8</sub> aromatics, (c) acetone, (d) MEK, (e) ethanol, (f) isopropanol, (g) ethyl acetate, and (h) butyl acetate from both workshops (workshops emission) and after ROG treatment devices (stack emission) in shoemaking, plastic surface coating, furniture coating, printing, and ship coating industries, respectively. Error bars represent the standard deviations of the concentration.

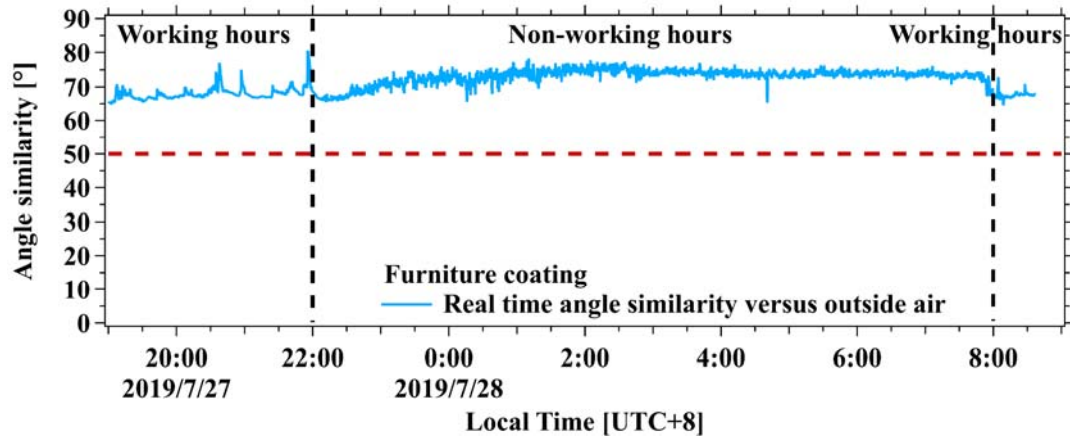

**Figure S8.** The  $\theta$  angles of mass spectra among real-time concentrations versus outside air measurement in the furniture coating industry.

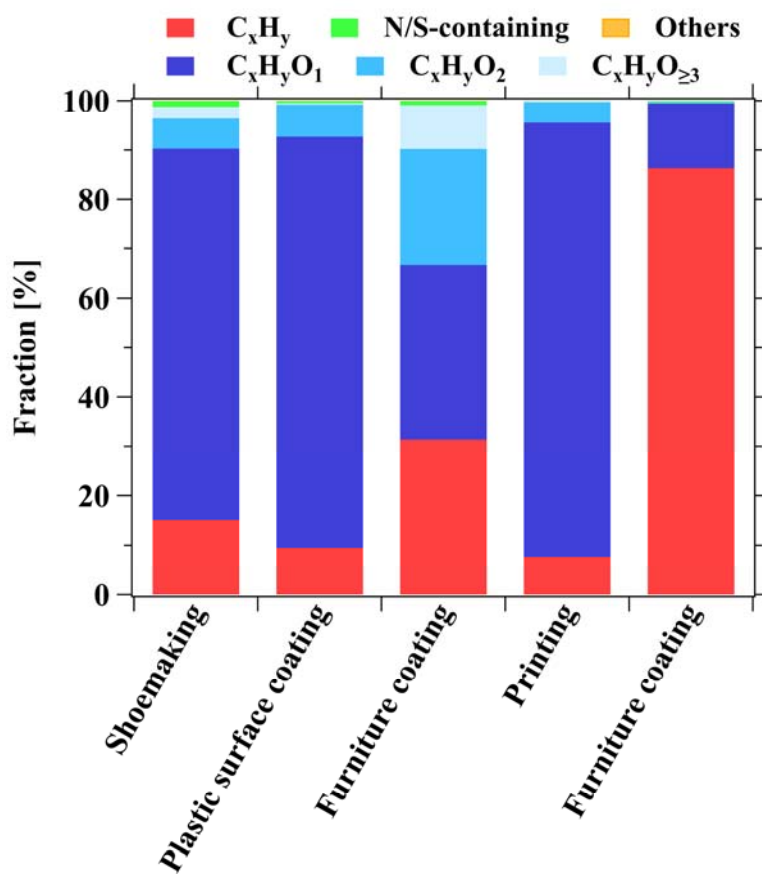

**Figure S9.** The fractions of different ROG categories measured by the PTR-ToF-MS from stack emissions across various industrial VCP sources.

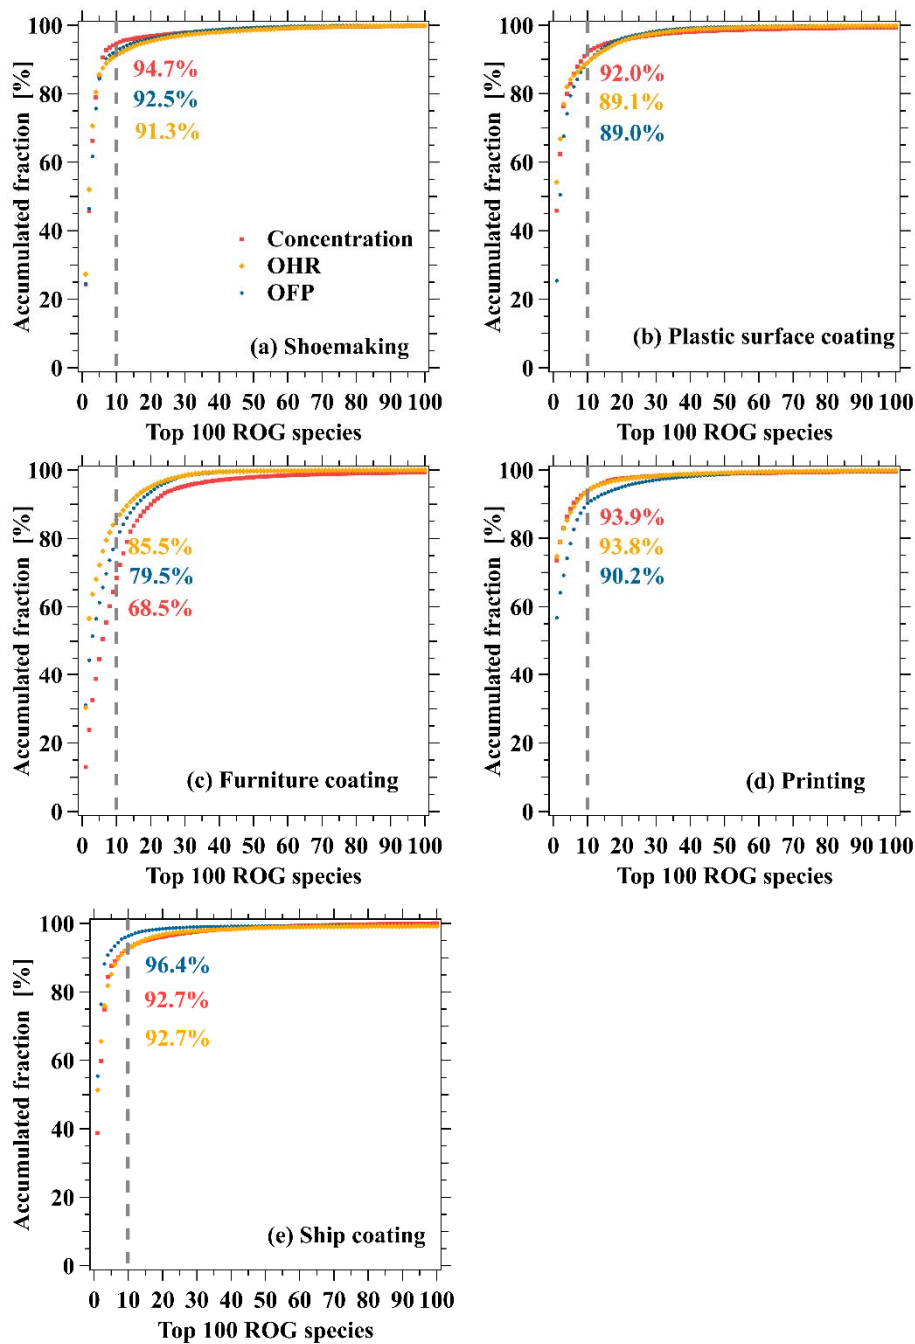

**Figure S10.** Accumulated fractions of the top 100 species in total ROG emissions, OHR, and OFP from (a) shoemaking, (b) plastic surface coating, (c) furniture coating, (d) printing, and (e) ship coating industries. The gray dashed lines represent accumulated fractions of the top ten in total ROG emissions, OHR and OFP.

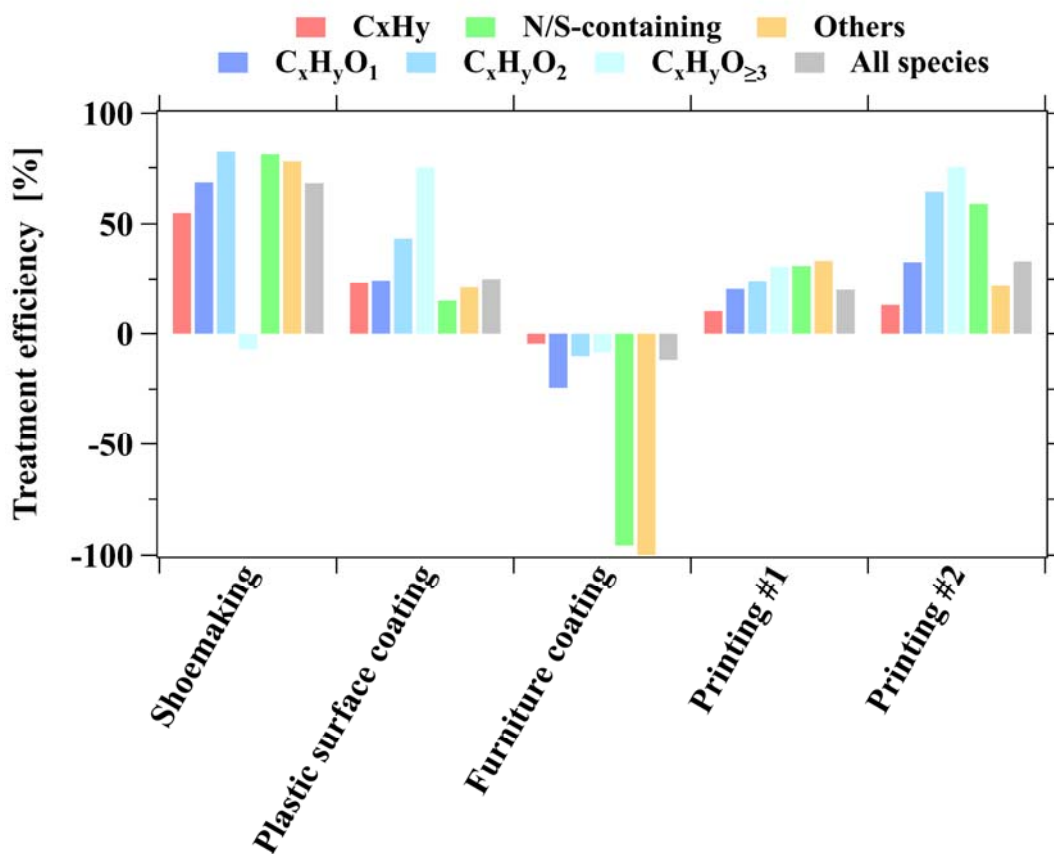

**Figure S11.** Treatment efficiencies of different ROG categories provided by treatment devices in various industrial VCP sources.

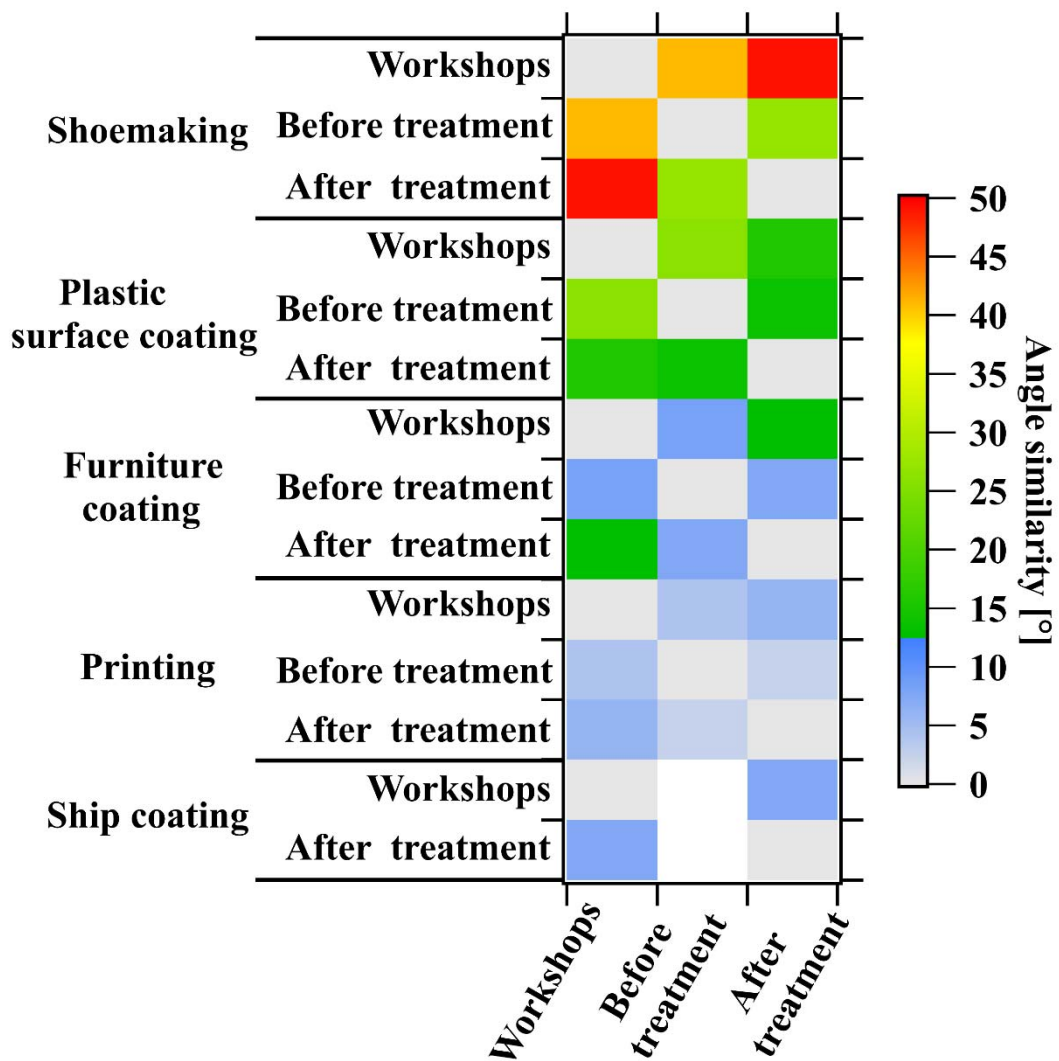

**Figure S12.** The  $\theta$  angles among the mass spectra of workshops, before and after treatment in industrial VCP sources.



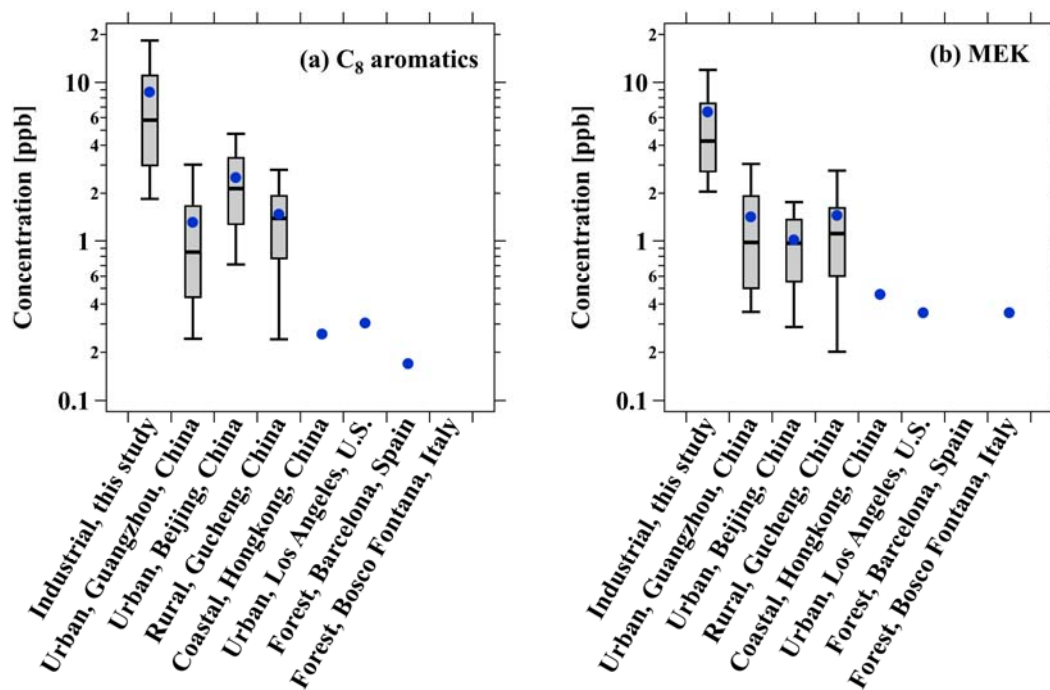

**Figure S13.** Boxplots of (a) C<sub>8</sub> aromatics and (b) MEK concentrations across the industrial site in this study and clean environments from previous studies.

## References

- Chen, Y., Yuan, B., Wang, C., Wang, S., He, X., Wu, C., Song, X., Huangfu, Y., Li, X. B., Liao, Y., and Shao, M.: Online measurements of cycloalkanes based on NO<sup>+</sup> chemical ionization in proton transfer reaction time-of-flight mass spectrometry (PTR-ToF-MS), *Atmos. Meas. Tech.*, 15, 6935-6947, 10.5194/amt-15-6935-2022, 2022.
- Estevan, C., Ferri, F., Sogorb, M. A., and Vilanova, E.: Characterization and evolution of exposure to volatile organic compounds in the Spanish shoemaking industry over a 5-year period, *J Occup Environ Hyg*, 9, 653-662, 10.1080/15459624.2012.725012, 2012.
- Fang, L., Liu, W., Chen, D., Li, G., Wang, D., Shao, X., and Nie, L.: Source Profiles of Volatile Organic Compounds (VOCs) from Typical Solventbased Industries in Beijing (in Chinese), *Environmental Science*, 40, 4395-4403, 10.13227/j.hjkx.201901128, 2019.
- Malherbe, L., and Mandin, C.: VOC emissions during outdoor ship painting and health-risk assessment, *Atmospheric Environment*, 41, 6322-6330, 10.1016/j.atmosenv.2007.02.018, 2007.
- Wang, S., Yuan, B., Wu, C., Wang, C., Li, T., He, X., Huangfu, Y., Qi, J., Li, X. B., Sha, Q., Zhu, M., Lou, S., Wang, H., Karl, T., Graus, M., Yuan, Z., and Shao, M.: Oxygenated volatile organic compounds (VOCs) as significant but varied contributors to VOC emissions from vehicles, *Atmos. Chem. Phys.*, 22, 9703-9720, 10.5194/acp-22-9703-2022, 2022.
- Zhao, R., Huang, L., Zhang, J., and Ouyang, F.: Emissions characteristics of volatile organic compounds (VOCs) from typical industries of solvent use in Chengdu City (in Chinese), *Acta Scientiae Circumstantiae*, 38, 1147-1154, 10.13671/j.hjkxxb.2017.0362, 2018.
- Zheng, J., Yu, Y., Mo, Z., Zhang, Z., Wang, X., Yin, S., Peng, K., Yang, Y., Feng, X., and Cai, H.: Industrial sector-based volatile organic compound (VOC) source profiles measured in manufacturing facilities in the Pearl River Delta, China, *Sci Total Environ*, 456-457, 127-136, 10.1016/j.scitotenv.2013.03.055, 2013.
- Zhou, Z., Deng, Y., Zhou, X., Wu, K., TAN, Q., Yin, D., Song, D., Chen, Q., and Zeng, W.: Source Profiles of Industrial Emission-Based VOCs in Chengdu (in Chinese), *Environmental Science*, 41, 3042-3055, 10.13227/j.hjkx.201912203, 2020.
